# Supplementary material
Source: PubMed Central journal article supplement (PMC6645106)
Supplement: ao7b00544_si_001.pdf [file ao7b00544_si_001.pdf]

## **Tailoring the Diameters of Polyaniline Nanofiber for Sensor Application**

Fuat Erden,<sup>†,‡</sup> Szu Cheng Lai,<sup>†</sup> Hong Chi,<sup>§</sup> FuKe Wang<sup>\*†</sup> and Chaobin He<sup>\*†,‡</sup>

<sup>†</sup>*Polymeric Materials Department, Institute of Materials Research and Engineering, Agency for Science, Technology and Research (A\*STAR), 2 Fusionopolis Way, #08-03 Innovis, Singapore 138634.*

<sup>‡</sup>*Department of Materials Science and Engineering, National University of Singapore, 9 Engineering Drive 1, Singapore 117576.*

<sup>§</sup>*Shandong Provincial Key Laboratory of Fine Chemicals, School of Chemistry of Pharmaceutical Engineering, Qilu University of Technology, Jinan 250353, China*

## Experimental details

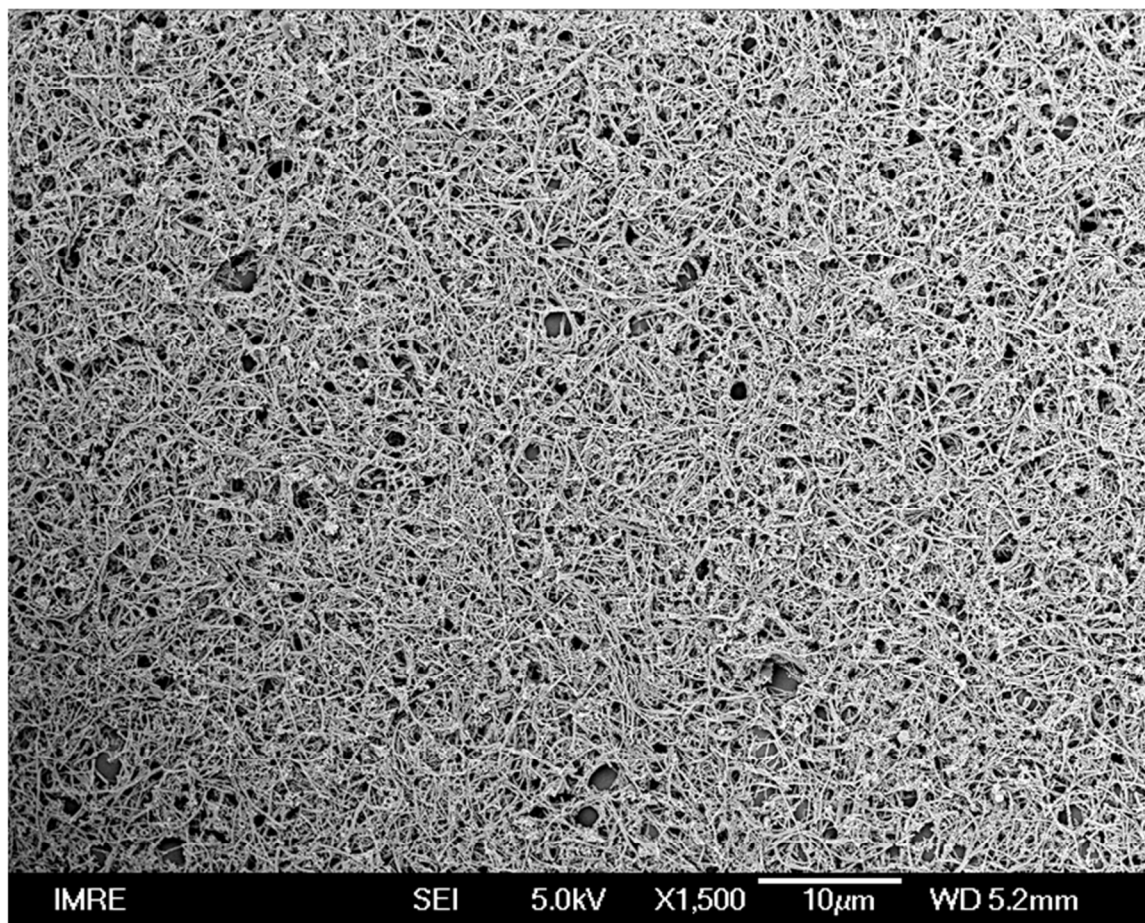

**Figure S1.** Low magnitude SEM image of polyaniline nanofibers prepared in ice-water bath.

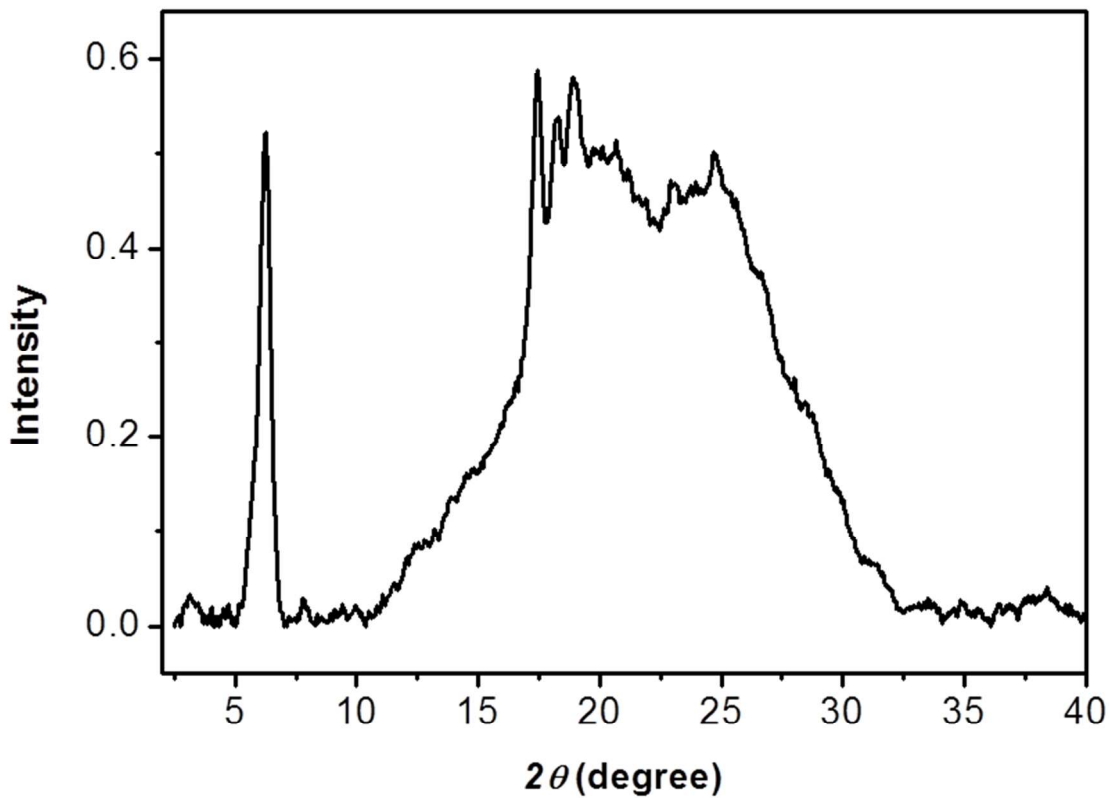

**Figure S2.** XRD patterns of assemblies of the amphiphilic aniline–glutamic acid complex.

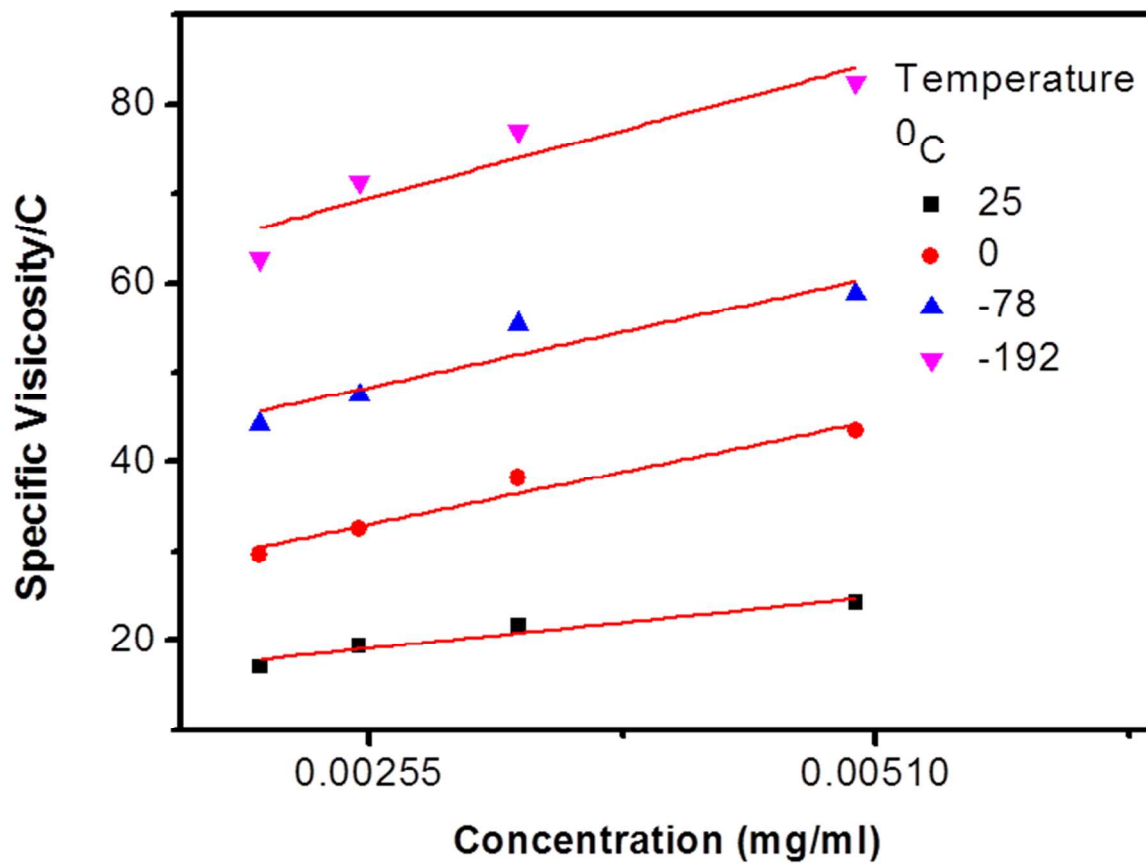

**Figure S3.** Specific viscosity change as function of polymer concentrations of PANI nanofibers synthesized at different temperatures.

**Table S1.** Intrinsic viscosity results of PANI nanofibers synthesized at different temperatures

| Polymerization temperatures (°C) | Intrinsic Viscosity |
|----------------------------------|---------------------|
| 25                               | 13.22               |
| 0                                | 21.28               |
| -78                              | 36                  |
| -192                             | 54.32               |

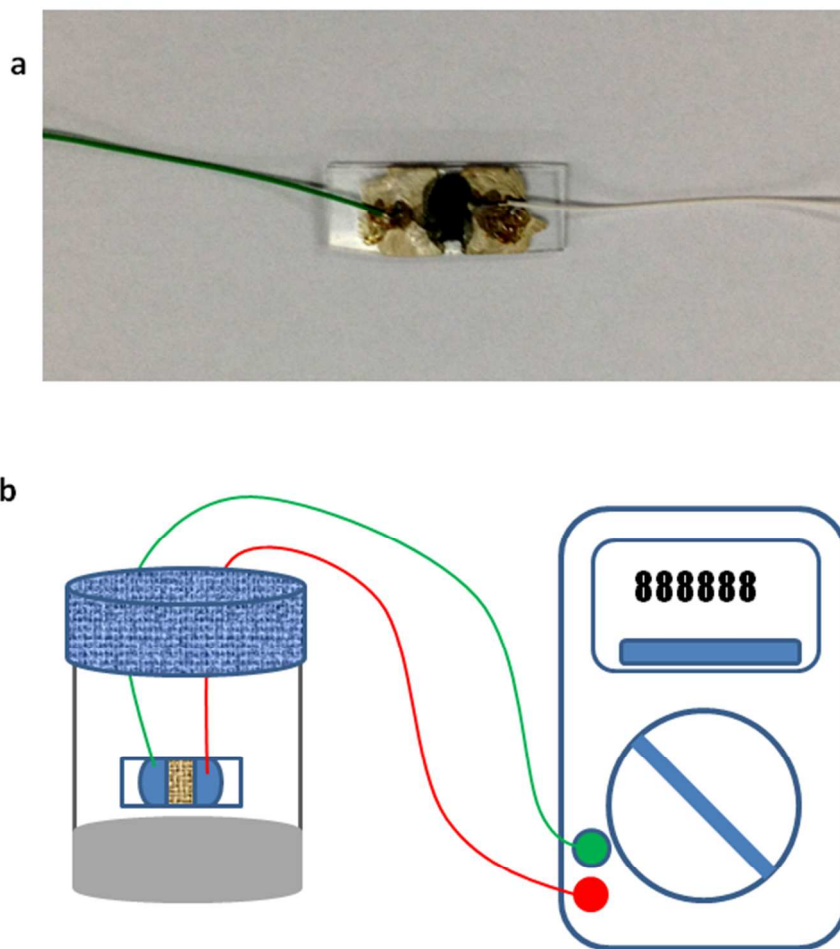

**Figure S4.** The home-made gas sensor and testing: (a) the gas sensor build on a glass slide with two silver paste electrodes and a film of the dedoped polyaniline nanofibers; (b) the apparatus for gas sensitivity measurement: the sensor was put in a sealed chamber that contains a solution of 1 M HCl, and the resistance was measured by using a digital multimeter.
